# Supplementary material
Source: PubMed Central journal article supplement (PMC6716773)
Supplement: jm8b00204_si_001.pdf [file jm8b00204_si_001.pdf]

**Supporting information:**

**Docking screens for dual inhibitors of disparate drug targets for Parkinson's disease**

Mariama Jaiteh<sup>1,†</sup>, Alexey Zeifman<sup>1,†</sup>, Marcus Saarinen<sup>2</sup>, Per Svenningsson<sup>2</sup>, Jose Bréa<sup>3</sup>,  
Maria Isabel Loza<sup>3</sup>, and Jens Carlsson<sup>1,\*</sup>

<sup>1</sup> Science for Life Laboratory, Department of Cell and Molecular Biology, Uppsala  
University, BMC Box 596, SE-751 24 Uppsala, Sweden.

<sup>2</sup> Center of Molecular Medicine, Department of Physiology and Pharmacology, Karolinska  
Institute, Stockholm, Sweden.

<sup>3</sup> USEF Screening Platform-BioFarma Research Group, Centre for Research in Molecular  
Medicine and Chronic Diseases, University of Santiago de Compostela, 15706 Santiago de  
Compostela, Spain.

<sup>†</sup>Contributed equally to this work.

## Table of contents

| Supporting Figures                                                                            | Page |
|-----------------------------------------------------------------------------------------------|------|
| Figure S1 - Enrichment curves for known A <sub>2A</sub> AR and MAO-B ligands.                 | S3   |
| Figure S2 - 2D similarity between known A <sub>2A</sub> AR and MAO-B ligands.                 | S4   |
| Figure S3 - Dose-response curves for compounds <b>1a</b> , <b>3</b> , and controls.           | S5   |
| Figure S4 - Functional assays for compounds <b>1a</b> and <b>3</b> at the A <sub>2A</sub> AR. | S5   |
| Figure S5 - MAO-B reactivation assays for compounds <b>1a</b> and <b>3</b> .                  | S6   |
| <b>Supporting Tables</b>                                                                      |      |
| Table S1 - Ligand enrichment by crystal structures of A <sub>2A</sub> AR and MAO-B.           | S7   |
| Table S2 - Binding site comparison between A <sub>2A</sub> AR and MAO-B structures.           | S7   |
| Table S3 - Compounds selected from the molecular docking screens.                             | S8   |
| Table S4 - Experimental data for ligands active at either the A <sub>2A</sub> AR or MAO-B.    | S9   |
| Table S5 - Most similar known A <sub>2A</sub> AR and MAO-B ligands to the discovered ligands. | S10  |
| Table S6 - Smiles and vendor information of analogs to compounds <b>1</b> and <b>3</b> .      | S11  |
| Table S7 - Experimental data for analogs of compound <b>1</b> .                               | S12  |
| Table S8 - Experimental data for analogs of compound <b>3</b> .                               | S13  |
| Table S9 - Summary of available PubChem bioassays for compounds <b>1</b> and <b>3</b> .       | S14  |
| Table S10 - Summary of targets for which compound <b>1</b> has significant activity.          | S14  |
| <b>References</b>                                                                             |      |

## Supporting Figures

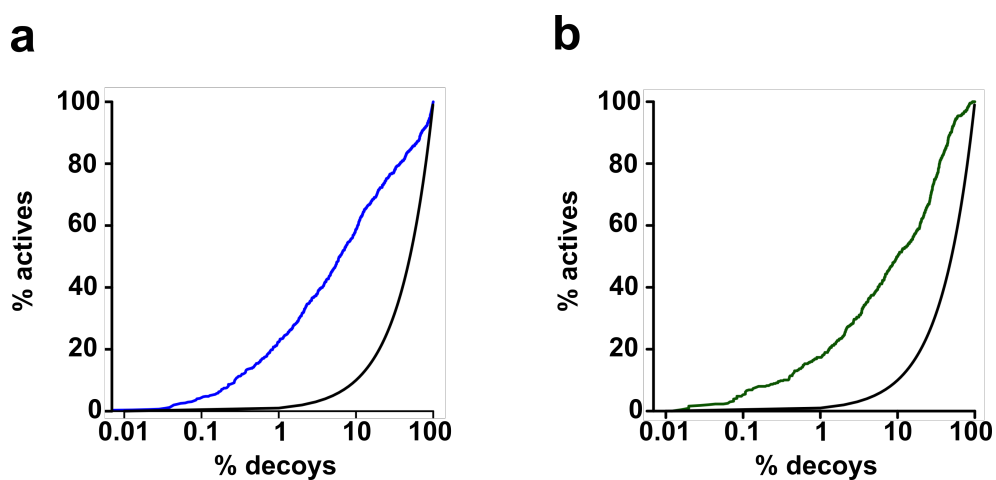

**Figure S1. Enrichment curves for known A<sub>2A</sub>AR and MAO-B ligands.** Receiver operator characteristic (ROC) curves for databases of ligands and property-matched decoys ranked by molecular docking. The percentage of ligands and decoys identified in the ranked database are shown on the y- and x-axis, respectively. The solid black line represents random enrichment of ligands. (a) Enrichment of A<sub>2A</sub>AR ligands and (b) MAO-B ligands by the crystal structures used in the virtual screen are shown.

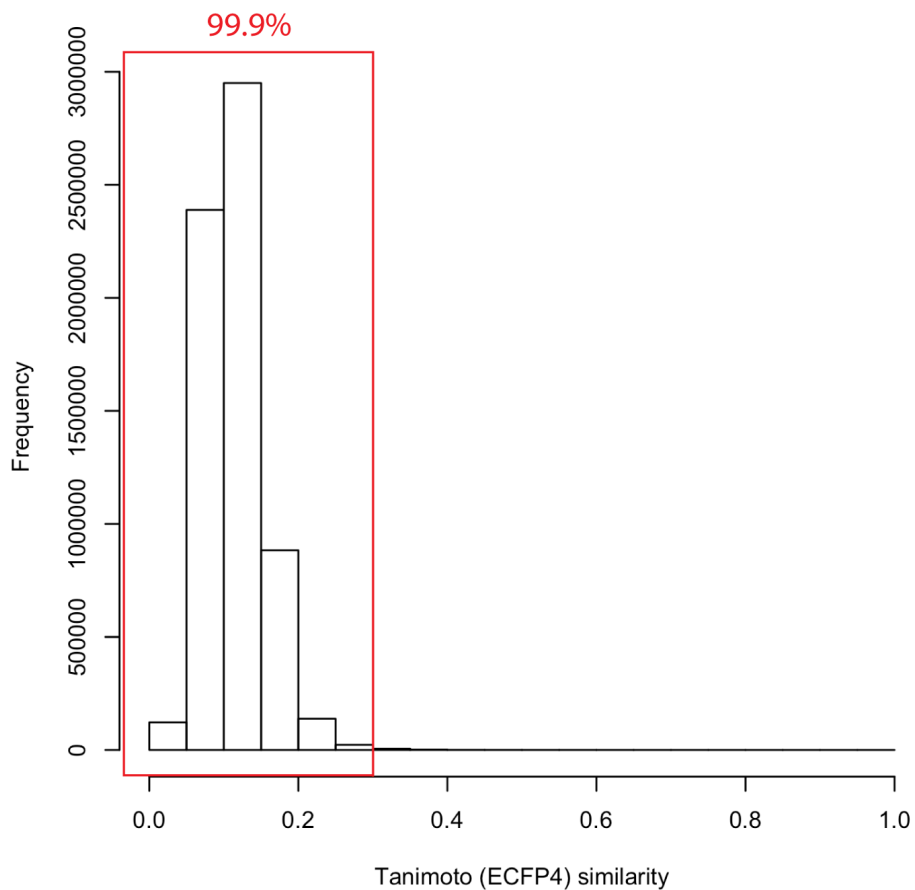

**Figure S2. 2D similarity between known A<sub>2A</sub>AR and MAO-B ligands.** The Tanimoto similarity (ECFP4 fingerprints) was calculated between all A<sub>2A</sub>AR (3898 compounds) and MAO-B (1671 compounds) ligands from the ChEMBL database<sup>1</sup>.

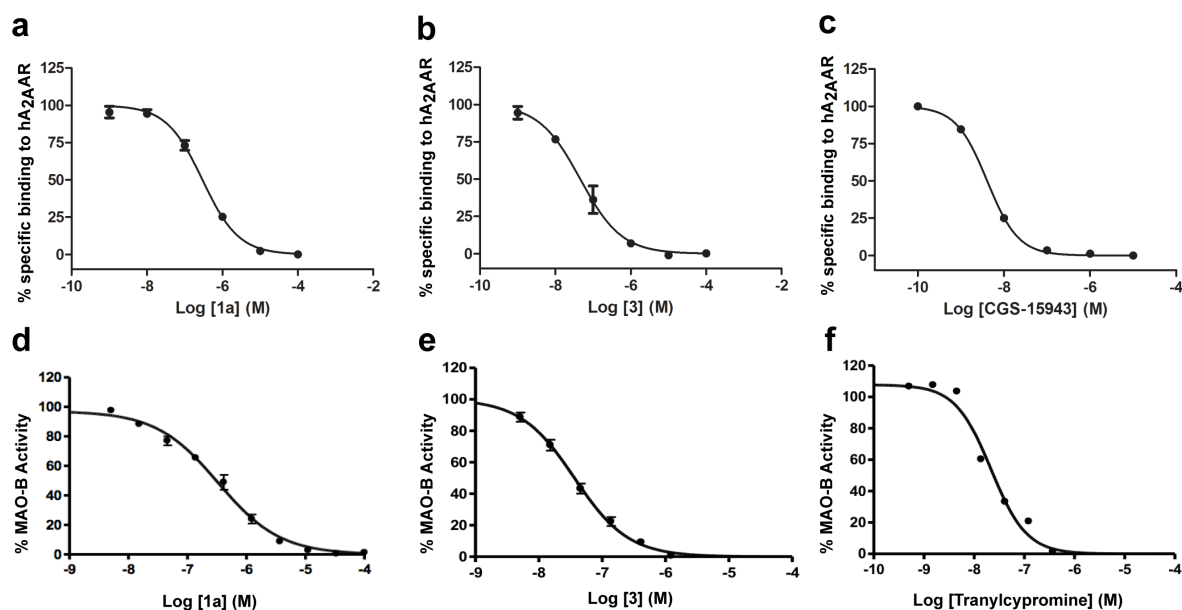

**Figure S3. Dose-response curves for compounds 1a, 3, and controls.** (a-c) Radioligand displacement curves for compounds **1a**, **3**, and control (CGS-15943,  $K_i = 1.3$  nM,  $n=1$ ) at the A<sub>2A</sub>AR.  $K_i$  values for compounds **1a** and **3** (Table 2 and Table 1, respectively) were determined from three independent experiments and the error bars represent the SEM. (d-f) Inhibition of MAO-B by compounds **1a**, **3** and control (Tranlycypromine,  $IC_{50} = 22$  nM,  $n=1$ ).  $IC_{50}$  values for compounds **1a** ( $n = 3$ , Table 2) and **3** ( $n = 2$ ,  $IC_{50} = 40 \pm 10$  nM obtained with modified MAO-B assay conditions compared to Table 1, see methods for details).

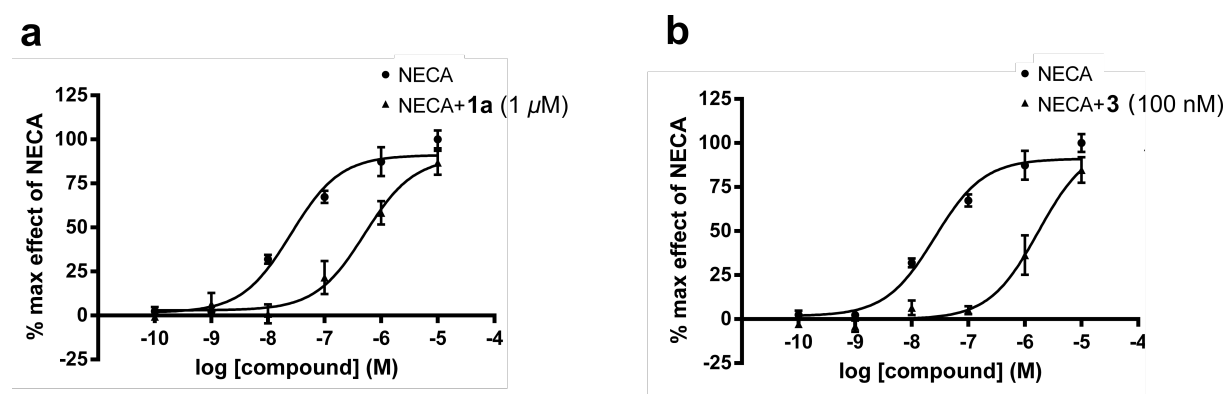

**Figure S4. Functional assays for compounds 1a and 3 at the A<sub>2A</sub>AR.** Functional assay based on measuring the production of cAMP for the agonist NECA in the presence or absence of compounds (a) **1a** and (b) **3**. The NECA dose-response curve shows a right-shift in the presence of both compounds, as expected for competitive antagonism.

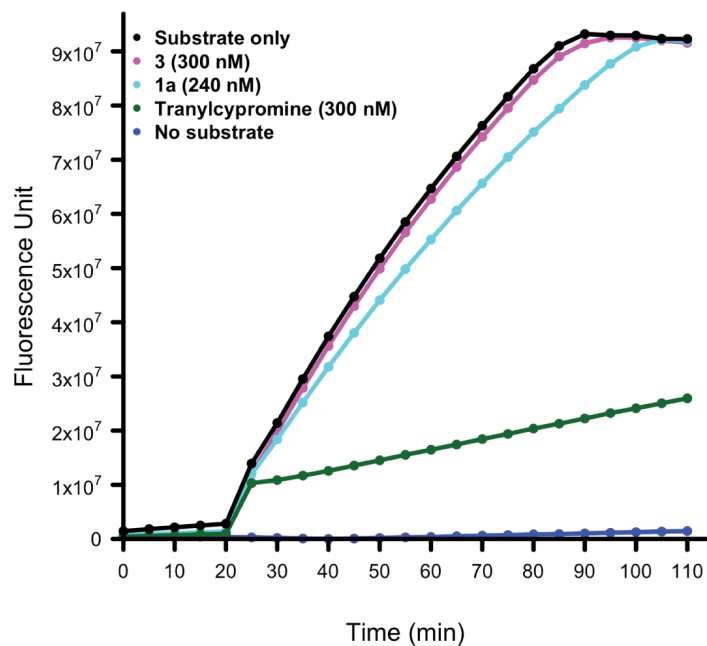

**Figure S5. MAO-B reactivation assays for compounds 1a and 3.** MAO-B was pre-incubated in presence of substrate and either compounds 1a, 3, or the irreversible inhibitor tranylcypromine. An excess of substrate was added after 20 minutes. The measured fluorescence increased for compounds 1a and 3, as expected for reversible inhibition, whereas only a small increase was observed for tranylcypromine that was used as control.

## Supporting Tables

**Table S1. Ligand enrichment by crystal structures of A<sub>2A</sub>AR and MAO-B. The selected structures are marked in green.**

| MAO-B crystal structure (chain) | Adjusted LogAUC <sup>a</sup> | A <sub>2A</sub> AR crystal structure | Adjusted LogAUC <sup>a</sup> |
|---------------------------------|------------------------------|--------------------------------------|------------------------------|
| 2V61 (B)                        | 28.4                         | 4EIY                                 | 25.7                         |
| 2V5Z (B)                        | 28.0                         | 3PWH                                 | 25.1                         |
| 2V5Z (A)                        | 27.8                         | 3EML                                 | 25.1                         |
| 2V60 (A)                        | 27.4                         | 3UZC                                 | 23.1                         |
| 2V60 (B)                        | 27.4                         | 3RFM                                 | 21.4                         |
| 4A7A (B)                        | 27.0                         | 3VGA                                 | 21.1                         |
| 3PO7 (A)                        | 26.7                         | 3UZA                                 | 18.5                         |
| 3PO7 (B)                        | 26.7                         | 3REY                                 | 17.5                         |
| 2V61 (A)                        | 26.7                         | 3VG9                                 | 13.6                         |
| 2C70 (A)                        | 26.4                         |                                      |                              |
| 4A79 (A)                        | 26.3                         |                                      |                              |
| 4A7A (A)                        | 26.2                         |                                      |                              |
| 2C70 (B)                        | 25.5                         |                                      |                              |
| 4A79 (B)                        | 25.0                         |                                      |                              |
| 3ZYX (A)                        | 17.1                         |                                      |                              |
| 3ZYX (B)                        | 16.0                         |                                      |                              |

<sup>a</sup>Known ligands and property-matched decoys were docked to the crystal structures. The performance of each crystal structure was quantified using the adjusted LogAUC<sup>2</sup>, which has values >0 if ligand enrichment is better than random.

**Table S2. Comparison of the binding sites of A<sub>2A</sub>AR and MAO-B using the ProBiS webserver (<http://probis.cmm.ki.si/>).**

| Query binding site | Target binding site <sup>a</sup> |       |                    |
|--------------------|----------------------------------|-------|--------------------|
|                    |                                  | MAO-B | A <sub>2A</sub> AR |
|                    | MAO-B                            | 4.21  | -1.83              |
| A <sub>2A</sub> AR | -1.83                            | 4.16  |                    |

<sup>a</sup>Binding site was defined as all residues within 7 Å of the co-crystallized ligand.

**Table S3. The 24 compounds selected from the molecular docking screens.**

| ID | Rank <sup>a</sup> | Smiles                                                       | ZINC code <sup>b</sup><br>(Screening Library) | Vendor        |
|----|-------------------|--------------------------------------------------------------|-----------------------------------------------|---------------|
| 1  | 54                | <chem>c1ccc(cc1)C(=O)Nc2[nH]c3ccccc3n2</chem>                | C12729683 (F)                                 | Enamine       |
| 2  | 386               | <chem>c1ccc(cc1)COC(=O)c2c(nn(n2)c3ccccc3)N</chem>           | C01424478 (L)                                 | VitasM        |
| 3  | 50                | <chem>COc1ccccc1)COC(=O)c2c(nn(n2)c3ccccc3)N</chem>          | C01429452 (L)                                 | VitasM        |
| 4  | 470               | <chem>C[C@H]1C(=O)Nc2cc(ccc2O1)Nc3c4c(c5ccccc5o4)ncn3</chem> | C32808492 (L)                                 | Enamine       |
| 5  | 146               | <chem>Cn1c2c(c(=O)[nH]c1=O)n3cc([nH]c3n2)c4ccc(cc4)Cl</chem> | C00506266 (L)                                 | VitasM        |
| 6  | 243               | <chem>Cc1ccc2c(c1)n3cnnc3c(n2)NCc4cccc(c4)OC</chem>          | C04835077 (L)                                 | ChemDiv       |
| 7  | 257               | <chem>Cn1c2c(ccc(n2)C(=O)Nc3ccccc3F)c(=O)n(c1=O)C</chem>     | C32796391 (L)                                 | Enamine       |
| 8  | 278               | <chem>c1ccc2c(c1)ccc(n2)C(=O)Nc3[nH]c4ccccc4n3</chem>        | C05262984 (L)                                 | Enamine       |
| 9  | 34                | <chem>Cn1c(=O)[nH]c(=O)n2c1nc2CC(=O)Nc3cccc4c3ccccc4</chem>  | C28527220 (L)                                 | Princeton-Bio |
| 10 | 464               | <chem>c1ccn2cc(nc2c1)C(=O)Nc3nc4c(cc(cc4s3)F)F</chem>        | C12525602 (L)                                 | Enamine       |
| 11 | 72                | <chem>c1ccc(cc1)c2cc([nH]n2)c3nc4c5ccccc5ncn4n3</chem>       | C32815325 (L)                                 | Enamine       |
| 12 | 482               | <chem>CSc1ccc(cc1)CNc2c3nncn3c4ccccc4n2</chem>               | C04910228 (L)                                 | ChemDiv       |
| 13 | 1                 | <chem>c1ccc(cc1)Nc2nccc(n2)c3ccnc3</chem>                    | C29559018 (F)                                 | VitasM        |
| 14 | 169               | <chem>c1cc(cc(c1)F)c2[nH]nc(n2)c3ccnc3</chem>                | C40164161(F)                                  | InnovaPharm   |
| 15 | 181               | <chem>Cc1ccccc1)Nc2nc(cs2)C(=O)NC</chem>                     | C62162472 (F)                                 | LifeChemicals |
| 16 | 202               | <chem>c1ccc2c(c1)ccc(n2)NCc3cccn3</chem>                     | C21026386 (F)                                 | Enamine       |
| 17 | 212               | <chem>c1ccc2c(c1)c(=O)[nH]c(n2)/C=C/c3ccnc3</chem>           | C08738871 (F)                                 | VitasM        |
| 18 | 215               | <chem>c1ccc2c(c1)[nH]c(n2)c3[nH]c4ccccc4n3</chem>            | C00097949 (F)                                 | VitasM        |
| 19 | 256               | <chem>c1ccc(cc1)c2cc(=O)c(n[nH]2)c3ccccc3</chem>             | C08672859 (F)                                 | Specs         |
| 20 | 271               | <chem>Cc1ccc(o1)C(=O)Nc2[nH]c3ccccc3n2</chem>                | C00995604 (F)                                 | Enamine       |
| 21 | 312               | <chem>Cc1c2ccccc2oc1C(=O)Nn3cnnc3</chem>                     | C03017636 (F)                                 | Chembridge    |
| 22 | 398               | <chem>c1ccc2c(c1)cc(o2)C(=O)Nc3ccncc3</chem>                 | C01216648 (F)                                 | Enamine       |
| 23 | 4                 | <chem>c1ccc(cc1)Nc2nccc(n2)c3ccco3</chem>                    | C26643194 (F)                                 | VitasM        |
| 24 | 94                | <chem>c1ccc(cc1)c2cnc(c(=O)[nH]2)c3ccccc3</chem>             | C08672863 (F)                                 | Specs         |

<sup>a</sup>Consensus rank in the screened library. The ZINC fragment (F: 0.8 million compounds) and lead-like (L: 4.6 million compounds) libraries were docked and compounds were selected separately from the two screens.

<sup>b</sup>ZINC code (<http://zinc.docking.org/>). The screened library is shown in parenthesis.



**Table S4. Experimental data for compounds that were active at either the A<sub>2A</sub>AR or MAO-B. The discovered dual-target ligands are shown in Table 1.**

| ID | 2D structure                                                                        | A <sub>2A</sub> AR<br>(K <sub>i</sub> /nM or %) <sup>a</sup> | MAO-B<br>(IC <sub>50</sub> /nM) <sup>b</sup> |
|----|-------------------------------------------------------------------------------------|--------------------------------------------------------------|----------------------------------------------|
| 6  | 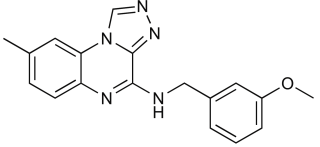   | 37 ± 1 %                                                     | 180 ± 10                                     |
| 7  |    | 24 ± 4 %                                                     | 61 ± 17                                      |
| 9  |    | 16 ± 4 %                                                     | 8700 ± 1100                                  |
| 12 |   | 20 ± 4 %                                                     | 250 ± 24                                     |
| 13 |  | 25 ± 3 %                                                     | 400 ± 36                                     |
| 15 |  | 7100 ± 220                                                   | 53%                                          |
| 18 |  | 140 ± 69                                                     | > 30,000                                     |
| 22 |  | 60 ± 2 %                                                     | 6900 ± 120                                   |
| 23 |  | 37 ± 4 %                                                     | 510 ± 47                                     |
| 24 |  | 47 ± 3 %                                                     | 140 ± 10                                     |

<sup>a</sup>Percent displacement at 30 μM or K<sub>i</sub> value expressed as a mean ± SEM from 2 (%) or 3 (K<sub>i</sub>) independent experiments performed in duplicate or triplicate.

<sup>b</sup>Percent inhibition at 30 μM or IC<sub>50</sub> value expressed as a mean ± SEM from 3 independent experiments performed in duplicate or triplicate.

**Table S5. Most similar known A<sub>2A</sub>AR and MAO-B ligands to the discovered ligands.**

| ID | 2D structure                                                                      | Closest dual ligand <sup>a</sup>                                                  | Closest A <sub>2A</sub> AR ligands <sup>b</sup>                                    | Closest MAO-B ligands <sup>b</sup>                                                  |
|----|-----------------------------------------------------------------------------------|-----------------------------------------------------------------------------------|------------------------------------------------------------------------------------|-------------------------------------------------------------------------------------|
| 1  | 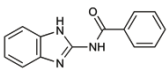 |  |  |  |
| 2  |  |  |  |  |
| 3  |  |  |  |  |
| 4  |  |  |  |  |

<sup>a</sup>Structure of compound with the maximal Tanimoto coefficient (ECFP4) when compared with all compounds with dual-activity at the A<sub>2A</sub>AR and MAO-B<sup>3-6</sup> from the ChEMBL database.

<sup>b</sup>Structure of compound with the maximal Tanimoto coefficient (ECFP4) when compared with all known compounds active at the A<sub>2A</sub>AR or MAO-B, respectively.

**Table S6. Smiles and vendor information for analogs of compounds 1 and 3.**

| <b>ID</b> | <b>Smiles</b>                                        | <b>Vendor</b> |
|-----------|------------------------------------------------------|---------------|
| <b>1a</b> | <chem>O=C(Nc2nc1ccc(Cl)c1[nH]2)c3ccccc3</chem>       | Enamine       |
| <b>1b</b> | <chem>COc2ccc3[nH]c(NC(=O)c1ccccc1)nc23</chem>       | Enamine       |
| <b>1c</b> | <chem>Cc3ccc2nc(NC(=O)c1ccccc1)[nH]c2c3</chem>       | Enamine       |
| <b>1d</b> | <chem>Cc1ccc(C(=O)Nc2nc3ccccc3[nH]2)c1</chem>        | VitasM        |
| <b>1e</b> | <chem>Cc1ccccc1C(=O)Nc1nc2ccccc2[nH]1</chem>         | VitasM        |
| <b>1f</b> | <chem>Cc1ccc(C(=O)Nc2nc3ccccc3[nH]2)cc1</chem>       | VitasM        |
| <b>1g</b> | <chem>Cc1ccc(C(=O)Nc2nc3ccccc3[nH]2)cc1C</chem>      | VitasM        |
| <b>1h</b> | <chem>COc1ccc(C(=O)Nc2nc3ccccc3[nH]2)c1</chem>       | VitasM        |
| <b>1i</b> | <chem>c1ccc(c1)C(=O)Nc2[nH]c3ccccc3n2O</chem>        | Enamine       |
| <b>3a</b> | <chem>Cc1ccc(COC(=O)c2nn(-c3ccccc3)nc2N)cc1</chem>   | VitasM        |
| <b>3b</b> | <chem>Cc1ccccc1COC(=O)c1nn(-c2ccccc2)nc1N</chem>     | VitasM        |
| <b>3c</b> | <chem>c1ccc(cc1)CNC(=O)c2c(nn(n2)c3ccccc3)N</chem>   | Enamine       |
| <b>3d</b> | <chem>Nc1nc(-c2ccccc2)nn1C(=O)CCc1ccccc1</chem>      | ChemDiv       |
| <b>3e</b> | <chem>Cc1ccc(-c2nc(N)n(C(=O)CCc3ccccc3)n2)c1</chem>  | ChemDiv       |
| <b>3f</b> | <chem>Nc1nc(-c2ccccc2Cl)nn1C(=O)CCc1ccccc1</chem>    | ChemDiv       |
| <b>3g</b> | <chem>Cc1ccc(-c2nc(N)n(C(=O)CCc3ccccc3)n2)cc1</chem> | ChemDiv       |
| <b>3h</b> | <chem>Cc1ccccc1-c1nc(N)n(C(=O)CCc2ccccc2)n1</chem>   | ChemDiv       |
| <b>3i</b> | <chem>Nc1nc(-c2ccc(Cl)cc2)nn1C(=O)CCc1ccccc1</chem>  | ChemDiv       |
| <b>3j</b> | <chem>Nc1nn(-c2ccccc2)nc1C(=O)O</chem>               | VitasM        |
| <b>3k</b> | <chem>COC1=CC=CC(CO)=C1</chem>                       | SigmaAldrich  |

**Table S7. Experimental data for analogs of compound 1. Analogs with dual-target activity are shown in Table 2.**

| ID | 2D structure                                                                        | $A_{2A}AR$<br>(%) <sup>a</sup> |
|----|-------------------------------------------------------------------------------------|--------------------------------|
| 1c | 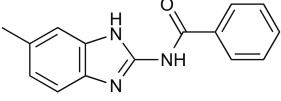   | 17 ± 1 %                       |
| 1d |    | 6 ± 3 %                        |
| 1e |    | 1 ± 1 %                        |
| 1f |    | 21 ± 4 %                       |
| 1g |    | 16 ± 4 %                       |
| 1h |   | 10 ± 4 %                       |
| 1i |  | 46 ± 5 %                       |

<sup>a</sup>Percent displacement at 10 μM expressed as a mean ± SEM from 2 independent experiments performed in duplicate or triplicate.

**Table S8. Experimental data for analogs of compound 3. Analogs that were evaluated at both the A<sub>2A</sub>AR and MAO-B are shown in Table 2.**

| ID | 2D structure | A <sub>2A</sub> AR (%) <sup>a</sup> | MAO-B (IC <sub>50</sub> /nM) <sup>b</sup> |
|----|--------------|-------------------------------------|-------------------------------------------|
| 3g |              | 31 ± 3 %                            | n.d. <sup>c</sup>                         |
| 3h |              | 38 ± 1 %                            | n.d.                                      |
| 3i |              | 9 ± 3 %                             | n.d.                                      |
| 3j |              | 5 ± 4 %                             | >10000                                    |
| 3k |              | 8 ± 2 %                             | >10000                                    |

<sup>a</sup>Percent displacement at 10 μM expressed as a mean ± SEM from 2 independent experiments performed in duplicate or triplicate.

<sup>b</sup>Inactive compounds (>10000 nM) were tested in one experiment performed in triplicate.

<sup>c</sup>Not determined.

**Table S9. Summary of available PubChem bioassays (<https://pubchem.ncbi.nlm.nih.gov>) for compounds 1 and 3.**

| ID | Inactive <sup>a</sup> | Active <sup>b</sup> | Active (curated) <sup>c</sup> |
|----|-----------------------|---------------------|-------------------------------|
| 1  | 710                   | 39                  | 22                            |
| 3  | 766                   | 5                   | 0                             |

<sup>a</sup>Number of PubChem bioassays in which the tested compound was annotated as inactive.

<sup>b</sup>Number of PubChem bioassays in which the tested compound was annotated as active.

<sup>c</sup>Number of PubChem bioassays in which the tested compound was annotated as active and had an activity value < 10  $\mu$ M or response >50% at this concentration. The identified targets for compound 1 (curated set) are summarized in Table S10.

**Table S10. Summary of targets for which compound 1 has significant activity in PubChem bioassays (<https://pubchem.ncbi.nlm.nih.gov/>).**

| ID                                                  | Target                                             | Activity <sup>a</sup> | BioAssay AID |
|-----------------------------------------------------|----------------------------------------------------|-----------------------|--------------|
| 1                                                   | Luciferase <sup>b</sup>                            | 0.2 $\mu$ M           | 773          |
|                                                     |                                                    | 1.5 $\mu$ M           | 588342       |
|                                                     |                                                    | 88% (10 $\mu$ M)      | 1006         |
|                                                     | ATPase family AAA domain-containing protein 5      | 0.5 $\mu$ M           | 504466       |
|                                                     | Ras-related protein Rab-9A                         | 1.6 $\mu$ M           | 485297       |
|                                                     | Matrix metalloproteinase 1                         | 3.5 $\mu$ M           | 618          |
|                                                     | Survival of motor neuron 2, centromeric isoform d  | 4 $\mu$ M             | 1458         |
|                                                     | RAR-related orphan receptor gamma                  | 6.3 $\mu$ M           | 2551         |
|                                                     |                                                    | 7.9 $\mu$ M           | 2546         |
|                                                     | Amyloid precursor protein                          | 214% (2 $\mu$ M)      | 1276         |
|                                                     | Tumor necrosis factor ligand superfamily member 10 | 62% (5 $\mu$ M)       | 1443         |
|                                                     | Cytotoxicity to PPC-1 cells                        | 60% (5 $\mu$ M)       | 1447         |
|                                                     | Heat shock protein 90-alpha                        | 57% (5.9 $\mu$ M)     | 1846         |
|                                                     | SUMO-1 specific protease 6                         | 95% (10 $\mu$ M)      | 2599         |
|                                                     |                                                    | 91% (12.5 $\mu$ M)    | 488915       |
|                                                     | SUMO-1/Sentrin specific peptidase 7                | 93% (5 $\mu$ M)       | 434973       |
|                                                     |                                                    | 100% (12.5 $\mu$ M)   | 488917       |
| SUMO/Sentrin specific protease 8                    | 90% (10 $\mu$ M)                                   | 2540                  |              |
|                                                     | 83% (12.5 $\mu$ M)                                 | 488912                |              |
| Caspase-3                                           | 96% (12.5 $\mu$ M)                                 | 488918                |              |
| Tumor necrosis factor ligand superfamily member 10B | 84% (10 $\mu$ M)                                   | 624354                |              |
| TWEAK-Fn14 interactions                             | 79% (10 $\mu$ M)                                   | 1159606               |              |

<sup>a</sup>Activity value or response at the concentration in parenthesis.

<sup>b</sup>Counterscreen for screening interference with Luciferase-based assays. Compound 1 (based on its similarity to luciferin) is likely to interact with firefly luciferase<sup>7</sup>, leading to false positives such assays. The assays performed in this study were not dependent on luciferase.

## References

- (1) Bento, A. P.; Gaulton, A.; Hersey, A.; Bellis, L. J.; Chambers, J.; Davies, M.; Krüger, F. A.; Light, Y.; Mak, L.; McGlinchey, S.; Nowotka, M.; Papadatos, G.; Santos, R.; Overington, J. P. The ChEMBL Bioactivity Database: An Update. *Nucleic Acids Res.* **2014**, *42*, D1083–D1090.
- (2) Mysinger, M. M.; Shoichet, B. K. Rapid Context-Dependent Ligand Desolvation in Molecular Docking. *J. Chem. Inf. Model.* **2010**, *50*, 1561–1573.
- (3) Rivara, S.; Piersanti, G.; Bartoccini, F.; Diamantini, G.; Pala, D.; Riccioni, T.; Stasi, M. A.; Cabri, W.; Borsini, F.; Mor, M.; Tarzia, G.; Minetti, P. Synthesis of (E)-8-(3-Chlorostyryl)caffeine Analogues Leading to 9-Deazaxanthine Derivatives as Dual A<sub>2A</sub> antagonists/MAO-B Inhibitors. *J. Med. Chem.* **2013**, *56*, 1247–1261.
- (4) Stöbel, A.; Schlenk, M.; Hinz, S.; Küppers, P.; Heer, J.; Gütschow, M.; Müller, C. E. Dual Targeting of Adenosine A<sub>2A</sub> Receptors and Monoamine Oxidase B by 4 H -3,1-Benzothiazin-4-Ones. *J. Med. Chem.* **2013**, *56*, 4580–4596.
- (5) Koch, P.; Akkari, R.; Brunschweiler, A.; Borrmann, T.; Schlenk, M.; Küppers, P.; Köse, M.; Radjainia, H.; Hockemeyer, J.; Drabczyńska, A.; Kieć-Kononowicz, K.; Müller, C. E. 1,3-Dialkyl-Substituted tetrahydropyrimido[1,2-F]purine-2,4-Diones as Multiple Target Drugs for the Potential Treatment of Neurodegenerative Diseases. *Bioorg. Med. Chem.* **2013**, *21*, 7435–7452.
- (6) Mikkelsen, G. K.; Langgård, M.; Schröder, T. J.; Kreilgaard, M.; Jørgensen, E. B.; Brandt, G.; Griffon, Y.; Boffey, R.; Bang-Andersen, B. Synthesis and SAR Studies of Analogues of 4-(3,3-Dimethyl-Butyrylamino)-3,5-Difluoro-N-Thiazol-2-Yl-Benzamide (Lu AA41063) as Adenosine A<sub>2A</sub> Receptor Ligands with Improved Aqueous Solubility. *Bioorg. Med. Chem. Lett.* **2015**, *25*, 1212–1216.
- (7) Thorne, N.; Auld, D. S.; Inglese, J. Apparent Activity in High-Throughput Screening: Origins of Compound-Dependent Assay Interference. *Curr. Opin. Chem. Biol.* **2010**, *14*, 315–324.
